# Supplementary material for: Anti-Inflammatory Chemical Profiling of the Australian Rainforest Tree Alphitonia petriei (Rhamnaceae)
Source: PubMed Central journal article supplement (PMC6273140; doi:10.3390/molecules21111521), 2016-11-11
Supplement: molecules-21-01521-s001.pdf [file molecules-21-01521-s001.pdf]

## Supplementary Materials: Anti-Inflammatory Chemical Profiling of the Australian Rainforest Tree *Alphitonia petriei* (Rhamnaceae)

Ritesh Raju, Dhanushka Gunawardena, Most Afia Ahktar, Mitchell Low, Paul Reddell and Gerald Münch

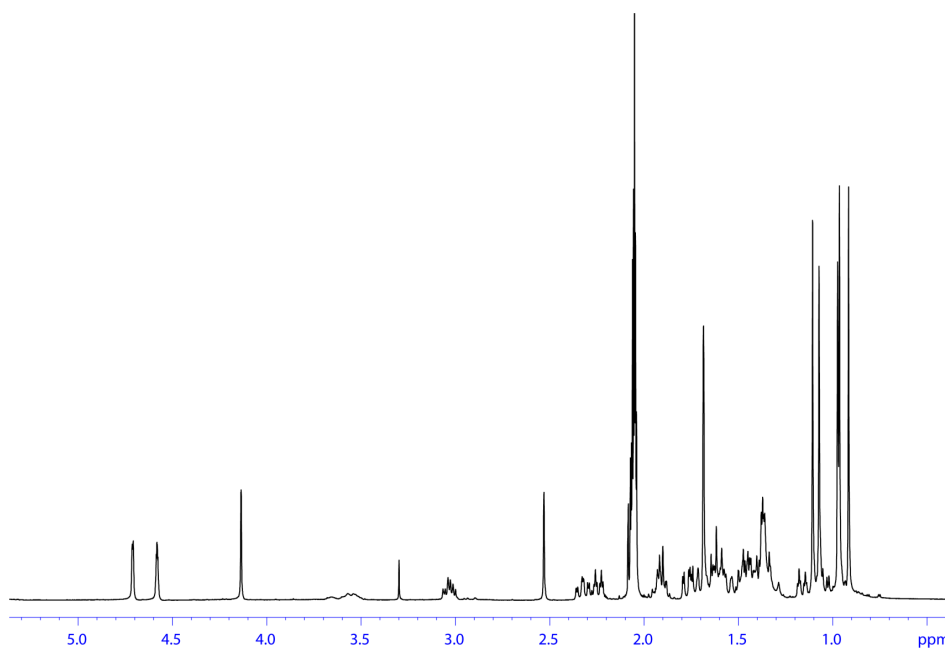

Figure S1. <sup>1</sup>H-NMR (400 MHz, Acetone-*d*<sub>6</sub>) spectrum of emmolic acid (1).

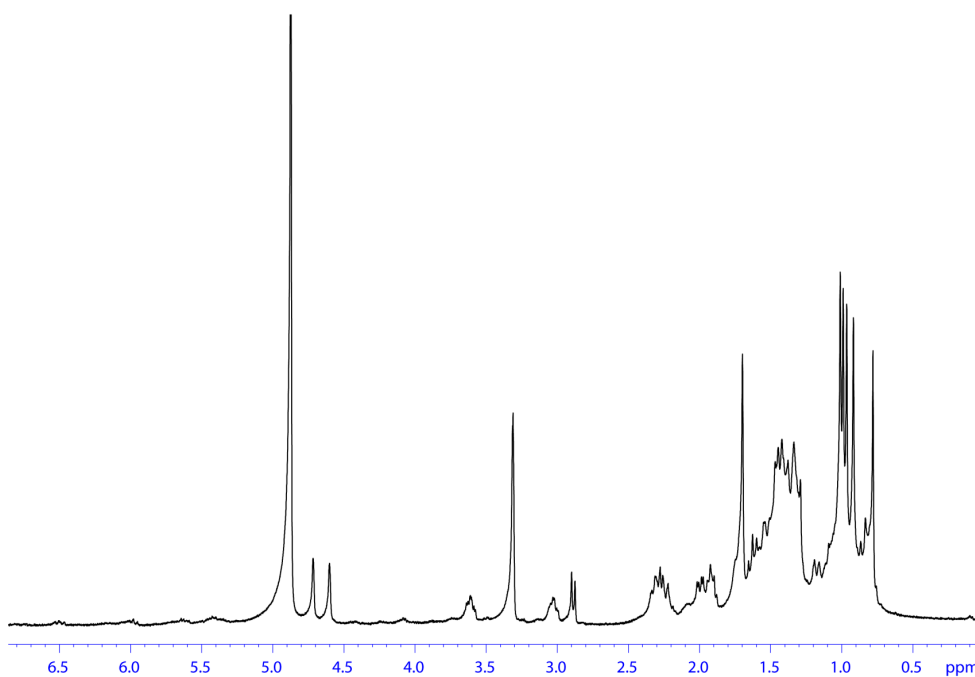

Figure S2. <sup>1</sup>H-NMR (400 MHz, Methanol-*d*<sub>4</sub>) spectrum of alphitolic acid (2).

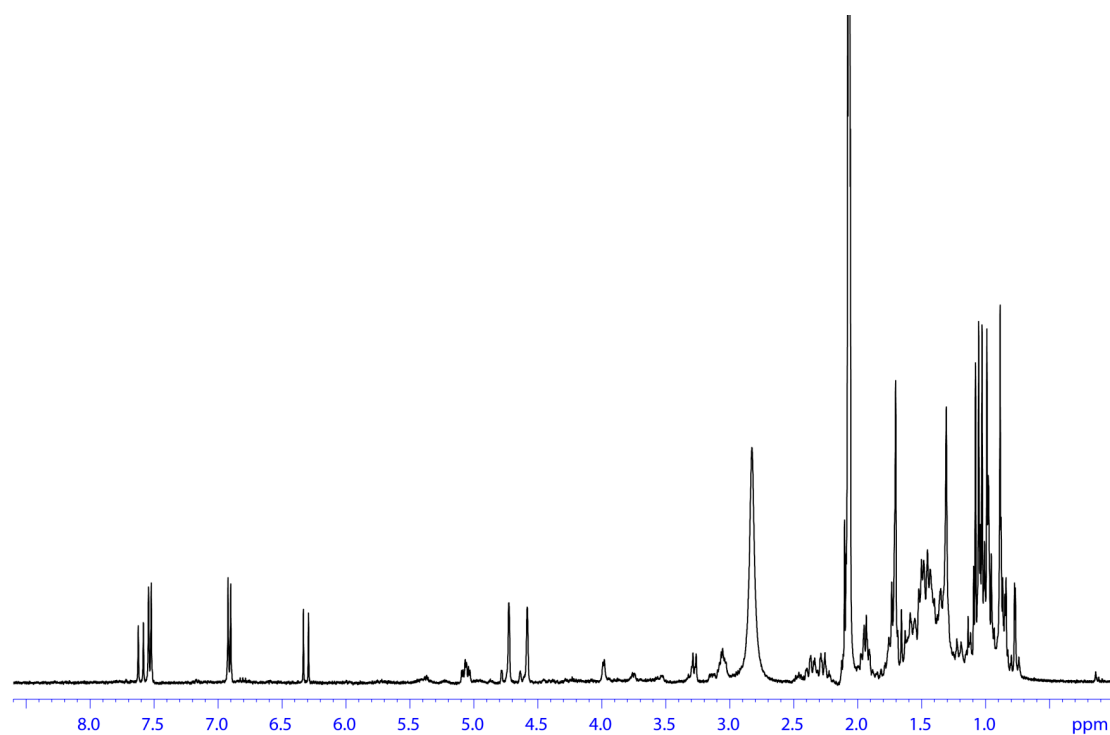

**Figure S3.** <sup>1</sup>H-NMR (400 MHz, Acetone-*d*<sub>6</sub>) spectrum of *trans*-coumaroyl aliphatic acid (3).

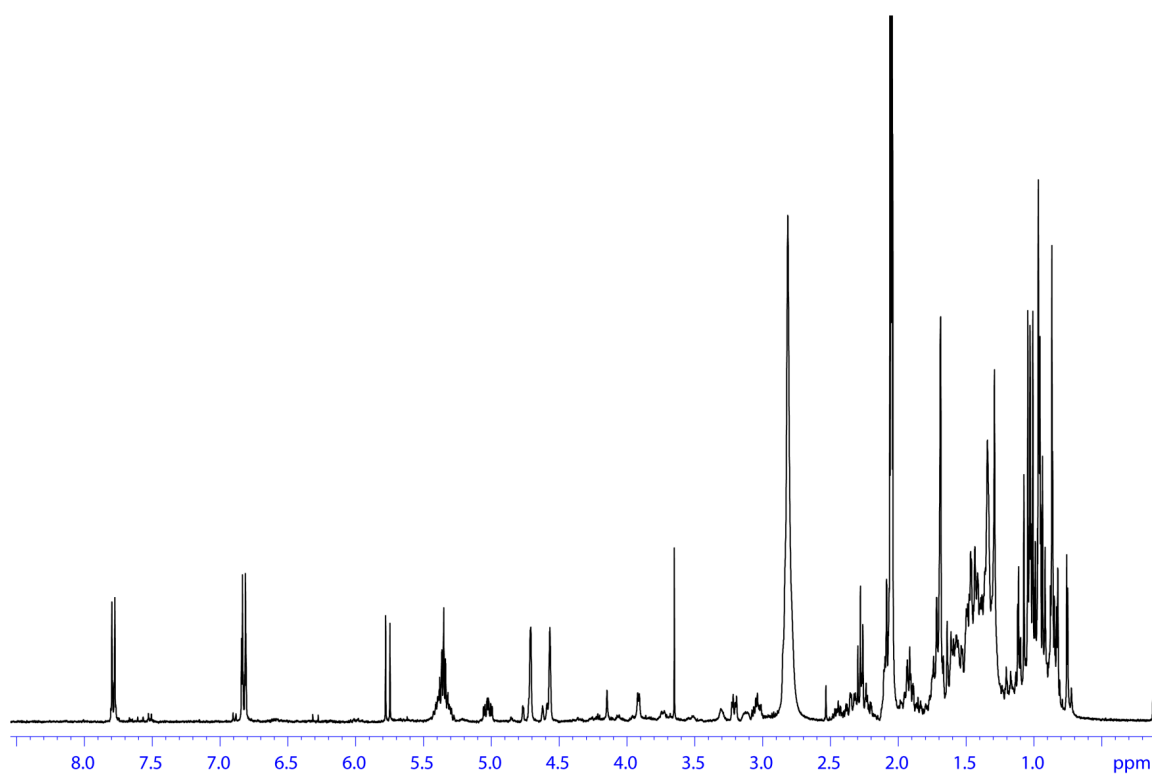

**Figure S4.** <sup>1</sup>H-NMR (400 MHz, Acetone-*d*<sub>6</sub>) spectrum of *cis*-coumaroyl aliphatic acid (4).

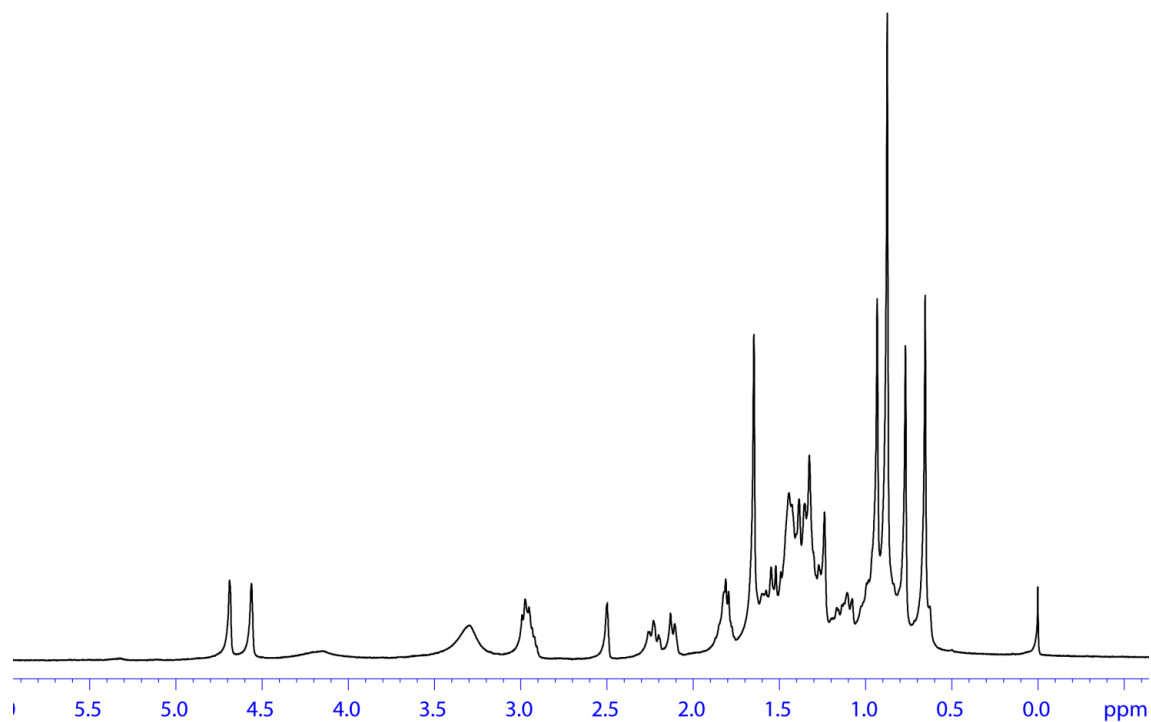

Figure S5. <sup>1</sup>H-NMR (400 MHz, DMSO-*d*<sub>6</sub>) spectrum of betulinic acid (5).

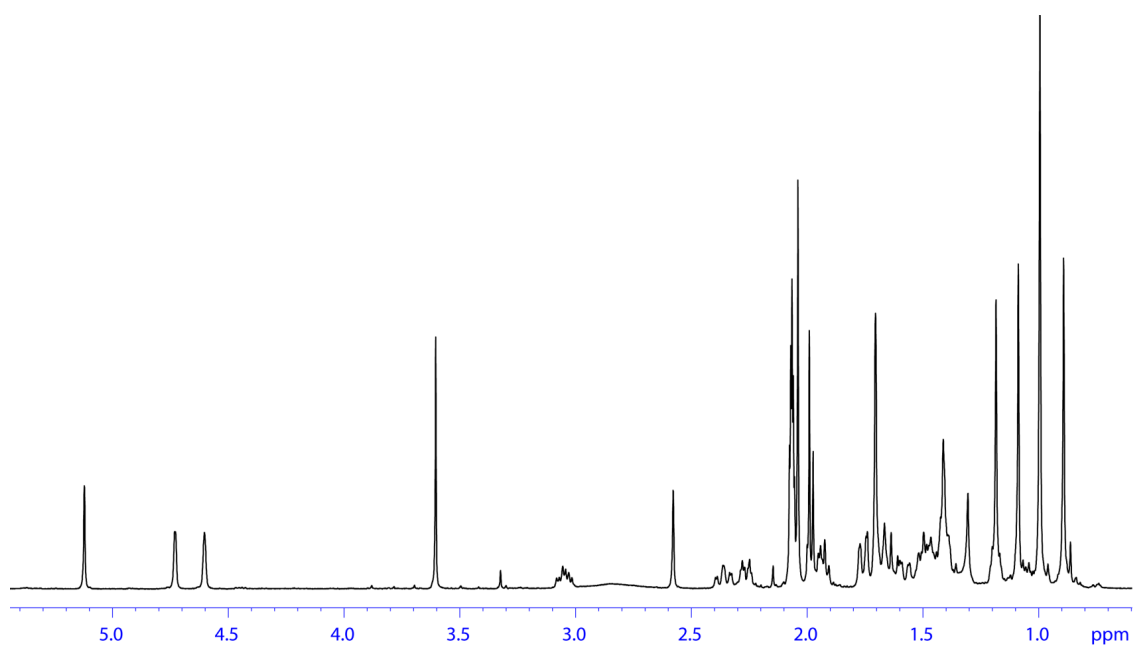

Figure S6. <sup>1</sup>H-NMR (400 MHz, Acetone-*d*<sub>6</sub>) spectrum of emmolic acid acetate (6).

**Table S1.**-NMR (400 MHz, Acetone-*d*<sub>6</sub>) data for (1).

| Pos | $\delta_{\text{H}}$ , Mult (J in Hz) | $\delta_{\text{C}}$ * | COSY   | HMBC               |
|-----|--------------------------------------|-----------------------|--------|--------------------|
| 1   | 2.30, s                              | 65.9                  |        | 2, 3, 5, 9, 10, 25 |
| 2   |                                      | 176.7                 |        |                    |
| 3   | 3.91, s                              | 83.6                  |        | 2, 4, 23           |
| 4   |                                      | 48.9                  |        |                    |
| 5   | 1.59, m                              | 56.3                  | 6      |                    |
| 6   | 1.35, 1.47, m                        | 23.3                  | 5, 7   |                    |
| 7   | 1.30, m                              | 34.0                  | 6      |                    |
| 8   |                                      | 41.6                  |        |                    |
| 9   | 1.52, m                              | 48.8                  | 11     |                    |
| 10  |                                      | 43.1                  |        |                    |
| 11  | 1.55, 0.92, m                        | 25.5                  | 9, 12  |                    |
| 12  | 1.46, m                              | 23.5                  | 11, 13 |                    |
| 13  | 2.20, m                              | 38.2                  | 12, 18 |                    |
| 14  |                                      | 42.9                  |        |                    |
| 15  | 1.42, 1.10, m                        | 29.9                  | 16     |                    |
| 16  | 1.80, 1.33, m                        | 30.3                  | 15     | 28                 |
| 17  |                                      |                       |        |                    |
| 18  | 1.53, m                              | 48.9                  | 13, 19 | 28                 |
| 19  | 3.03, m                              | 47.0                  | 18, 21 |                    |
| 20  |                                      | 150.6                 |        |                    |
| 21  | 1.81, 1.42, m                        | 36.7                  | 22     |                    |
| 22  | 1.36, m                              | 38.8                  | 21     |                    |
| 23  | 1.07, s                              | 30.3                  |        | 3, 4, 5, 24        |
| 24  | 0.91 s                               | 18.7                  |        | 4, 5, 23           |
| 25  | 1.11, s                              | 17.8                  |        | 1, 9, 10           |
| 26  | 0.96, s                              | 16.2                  |        | 8, 9, 14           |
| 27  | 0.97, s                              | 14.2                  |        | 8, 13, 14, 15      |
| 28  |                                      | 177.6                 |        |                    |
| 29  | 4.71, s, 4.58, s                     | 110.1                 |        | 19, 30             |
| 30  | 1.69, s                              | 19.4                  |        | 19, 20, 29         |

\* assignments supported by HSQC and HMBC experiments.

Table S2.-NMR (400 MHz, MeOH-*d*<sub>4</sub>) data for (2).

| Pos | $\delta_{\text{H}}$ , Mult (J in Hz) | $\delta_{\text{C}}$ * | COSY       | HMBC          |
|-----|--------------------------------------|-----------------------|------------|---------------|
| 1   | 1.99, 0.84, m                        | 48.3                  | 2          | 2, 3, 5, 10   |
| 2   | 3.62, m                              | 69.7                  | 1, 3       |               |
| 3   | 2.89, d (9.4)                        | 84.3                  | 2          | 2, 4, 23, 24  |
| 4   |                                      | 40.5                  |            |               |
| 5   | 0.81, m                              | 56.7                  | 6          |               |
| 6   | 1.45, m <sup>a</sup>                 | 19.1                  | 5, 7       |               |
| 7   | 1.42, m <sup>a</sup>                 | 35.3                  | 6          |               |
| 8   |                                      | 42.0                  |            |               |
| 9   | 1.37, m                              | 52.0                  | 11         |               |
| 10  |                                      | 39.4                  |            |               |
| 11  | 1.46, 1.31, m                        | 22.0                  | 9, 12      |               |
| 12  | 1.70, 1.10, m                        | 26.7                  | 11, 13, 18 |               |
| 13  | 2.31, m                              | 39.5                  | 12         |               |
| 14  |                                      | 43.4                  |            |               |
| 15  | 1.20                                 | 30.8                  | 16         |               |
| 16  | 2.24, 1.42, m                        | 33.2                  | 15         |               |
| 17  |                                      | 57.4                  |            |               |
| 18  | 1.63, m                              | 50.3                  | 13, 19     |               |
| 19  | 3.02, m                              | 48.4                  | 18, 21     |               |
| 20  |                                      | 151.8                 |            |               |
| 21  | 1.95, 1.40, m                        | 31.6                  | 19, 22     |               |
| 22  | 2.28, m                              | 34.7                  | 21         |               |
| 23  | 0.99, s                              | 29.1                  |            | 3, 4, 5, 24   |
| 24  | 0.78, s                              | 17.1                  |            | 3, 4, 5, 23   |
| 25  | 0.92, s                              | 17.8                  |            | 1, 5, 9, 10   |
| 26  | 0.97, s                              | 16.5                  |            | 7, 8, 9, 14   |
| 27  | 1.01, s                              | 14.9                  |            | 8, 13, 14, 15 |
| 28  |                                      | 179.7                 |            |               |
| 29  | 4.72, 4.60, s                        | 110.2                 |            | 19, 30        |
| 30  | 1.70, s                              | 19.4                  |            | 19, 20, 29    |

\* assignments supported by HSQC and HMBC experiments; <sup>a</sup> overlapping signals.

Table S3.-NMR (400 MHz, Acetone-*d*<sub>6</sub>) data for (3).

| Pos | $\delta_{\text{H}}$ , Mult (J in Hz)      | $\delta_{\text{C}}$ * | COSY   | HMBC         |
|-----|-------------------------------------------|-----------------------|--------|--------------|
| 1   | 1.92, 0.90, m                             | 40.2                  | 2      |              |
| 2   | 4.88, ddd (11.2, 10.0, 4.4)               | 72.6                  | 1, 3   | 1'           |
| 3   | 3.10, dd (10.0, 5.7)                      | 78.6                  | 2      | 1, 2, 23, 24 |
| 4   |                                           | 44.5                  |        |              |
| 5   | 0.83, m                                   | 55.0                  | 6      |              |
| 6   | 1.32 <sup>b</sup> , 1.21, m               | 21.1                  | 5, 7   |              |
| 7   | 1.35 <sup>c</sup> , m                     | 34.1                  | 6      |              |
| 8   |                                           | 41.4                  |        |              |
| 9   | 1.51 <sup>a</sup> , m                     | 48.9                  | 11     |              |
| 10  |                                           | 43.0                  |        |              |
| 11  | 1.60, 0.98, m                             | 25.3                  | 9, 12  |              |
| 12  | 1.50 <sup>a</sup> , m                     | 24.8                  | 11, 13 |              |
| 13  | 2.22, m                                   | 37.8                  | 12, 18 |              |
| 14  |                                           | 42.8                  |        |              |
| 15  | 1.42, 1.10, m                             | 29.6                  | 16     |              |
| 16  | 1.80 <sup>d</sup> , 1.31 <sup>b</sup> , m | 30.4                  | 15     |              |
| 17  |                                           | 57.3                  |        |              |
| 18  | 1.35 <sup>c</sup> , m                     | 50.0                  | 13, 19 |              |
| 19  | 2.94, m                                   | 47.0                  | 18, 21 |              |
| 20  |                                           | 150.6                 |        |              |
| 21  | 1.81 <sup>d</sup> , 1.42, m               | 36.6                  | 22     |              |
| 22  | 1.34, m                                   | 34.0                  | 21     |              |
| 23  | 0.95, s                                   | 29.0                  |        |              |
| 24  | 0.74, s                                   | 17.2                  |        |              |
| 25  | 0.94, s                                   | 14.7                  |        |              |
| 26  | 0.87, s                                   | 16.0                  |        |              |
| 27  | 0.90, s                                   | 17.3                  |        |              |
| 28  |                                           | 177.6                 |        |              |
| 29  | 4.68, s, 4.54, s                          | 110.1                 |        |              |
| 30  | 1.64, s                                   | 19.3                  |        |              |
| 1'  |                                           | 166.8                 |        |              |
| 2'  | 7.52 <sup>e</sup>                         | 144.5                 |        | 1'           |
| 3'  | 6.31, d (16.0)                            | 115.5                 |        | 1', 4'       |
| 4'  |                                           | 125.6                 |        |              |
| 5'  | 7.51 <sup>c</sup> , d (8.3)               | 130.5                 |        | 3', 7', 9'   |
| 6'  | 6.80, d (8.3)                             | 116.3                 |        | 4', 7', 8'   |
| 7'  |                                           | 160.0                 |        |              |
| 8'  | 6.80, d (8.3)                             | 116.3                 |        | 4', 6', 7'   |
| 9'  | 7.51 <sup>c</sup> , d (8.3)               | 130.5                 |        | 3', 5', 7'   |

\* assignments supported by HSQC and HMBC experiments; <sup>a-e</sup> overlapping signals.

Table S4.-NMR (400 MHz, Acetone-*d*<sub>6</sub>) data for (4).

| Pos | $\delta_{\text{H}}$ , Mult (J in Hz)      | $\delta_{\text{C}}$ * | COSY   | HMBC         |
|-----|-------------------------------------------|-----------------------|--------|--------------|
| 1   | 1.92, 0.90, m                             | 40.4                  | 2      |              |
| 2   | 4.88, ddd (11.1, 10.0, 4.2)               | 72.5                  | 1, 3   | 1'           |
| 3   | 3.12, dd (10.0, 5.7)                      | 78.9                  | 2      | 1, 2, 23, 24 |
| 4   |                                           | 44.0                  |        |              |
| 5   | 0.83, m                                   | 54.0                  | 6      |              |
| 6   | 1.32 <sup>b</sup> , 1.21, m               | 21.0                  | 5, 7   |              |
| 7   | 1.35 <sup>c</sup> , m                     | 34.1                  | 6      |              |
| 8   |                                           | 41.2                  |        |              |
| 9   | 1.51 <sup>a</sup> , m                     | 48.7                  | 11     |              |
| 10  |                                           | 43.0                  |        |              |
| 11  | 1.60, 0.98, m                             | 25.3                  | 9, 12  |              |
| 12  | 1.50 <sup>a</sup> , m                     | 24.6                  | 11, 13 |              |
| 13  | 2.23, m                                   | 37.8                  | 12, 18 |              |
| 14  |                                           | 42.8                  |        |              |
| 15  | 1.42, 1.10, m                             | 29.6                  | 16     |              |
| 16  | 1.80 <sup>d</sup> , 1.31 <sup>b</sup> , m | 30.4                  | 15     |              |
| 17  |                                           | 57.2                  |        |              |
| 18  | 1.35 <sup>c</sup> , m                     | 50.0                  | 13, 19 |              |
| 19  | 2.90, m                                   | 47.0                  | 18, 21 |              |
| 20  |                                           | 150.5                 |        |              |
| 21  | 1.81 <sup>d</sup> , 1.42, m               | 36.6                  | 22     |              |
| 22  | 1.34, m                                   | 34.0                  | 21     |              |
| 23  | 0.93, s                                   | 28.0                  |        |              |
| 24  | 0.78, s                                   | 17.1                  |        |              |
| 25  | 0.96, s                                   | 14.4                  |        |              |
| 26  | 0.87, s                                   | 15.9                  |        |              |
| 27  | 0.90, s                                   | 17.3                  |        |              |
| 28  |                                           | 177.2                 |        |              |
| 29  | 4.71, s, 4.57, s                          | 110.1                 |        |              |
| 30  | 1.60, s                                   | 19.3                  |        |              |
| 1'  |                                           | 166.8                 |        |              |
| 2'  | 6.83 <sup>c</sup>                         | 144.5                 |        | 1'           |
| 3'  | 5.77, d (12.9)                            | 115.5                 |        | 1', 4'       |
| 4'  |                                           | 125.6                 |        |              |
| 5'  | 7.79, d (8.3)                             | 130.7                 |        | 3', 7', 9'   |
| 6'  | 6.83 <sup>e</sup> , d (8.3)               | 116.4                 |        | 4', 7', 8'   |
| 7'  |                                           | 160.0                 |        |              |
| 8'  | 6.83 <sup>e</sup> , d (8.3)               | 116.4                 |        | 4', 6', 7'   |
| 9'  | 7.79, d (8.3)                             | 130.7                 |        | 3', 5', 7'   |

\* assignments supported by HSQC and HMBC experiments; <sup>a-e</sup> overlapping signals.

**Table S5.**-NMR (400 MHz, DMSO-*d*<sub>6</sub>) data for (5).

| Pos | $\delta_{\text{H}}$ , Mult (J in Hz) | $\delta_{\text{C}}$ * | COSY       |
|-----|--------------------------------------|-----------------------|------------|
| 1   | 1.89, 0.95, m                        | 48.3                  | 2          |
| 2   | 2.25, 2.09, m                        | 39.7                  | 1, 3       |
| 3   | 2.97, m                              | 77.3                  | 2          |
| 4   |                                      | 39.7                  |            |
| 5   | 0.80, m                              | 55.9                  | 6          |
| 6   | 1.43, m <sup>a</sup>                 | 18.9                  | 5, 7       |
| 7   | 1.42, m <sup>a</sup>                 | 36.0                  | 6          |
| 8   |                                      | 41.7                  |            |
| 9   | 1.40, m                              | 52.5                  | 11         |
| 10  |                                      | 39.4                  |            |
| 11  | 1.40, 1.38, m                        | 22.0                  | 9, 12      |
| 12  | 1.65, 1.08, m                        | 25.5                  | 11, 13, 18 |
| 13  | 2.36, m                              | 39.9                  | 12         |
| 14  |                                      | 42.0                  |            |
| 15  | 1.20                                 | 30.8                  | 16         |
| 16  | 2.24, 1.42, m                        | 33.2                  | 15         |
| 17  |                                      | 57.4                  |            |
| 18  | 1.63, m                              | 50.3                  | 13, 19     |
| 19  | 3.02, m                              | 48.4                  | 18, 21     |
| 20  |                                      | 151.8                 |            |
| 21  | 1.95, 1.40, m                        | 31.6                  | 19, 22     |
| 22  | 2.28, m                              | 34.7                  | 21         |
| 23  | 0.77, s                              | 29.1                  |            |
| 24  | 0.66, s                              | 17.0                  |            |
| 25  | 0.87, s                              | 17.7                  |            |
| 26  | 0.87, s                              | 16.1                  |            |
| 27  | 0.93, s                              | 14.6                  |            |
| 28  |                                      | 179.5                 |            |
| 29  | 4.69, 4.57, s                        | 110.0                 |            |
| 30  | 1.65, s                              | 19.4                  |            |

\* assignments supported by HSQC and HMBC experiments; <sup>a</sup> overlapping signals.



Table S6.-NMR (400 MHz, Acetone-*d*<sub>6</sub>) data for (6).

| Pos | $\delta_{\text{H}}$ , Mult (J in Hz) | $\delta_{\text{C}}$ * | COSY   | HMBC               |
|-----|--------------------------------------|-----------------------|--------|--------------------|
| 1   | 2.58, s                              | 62.7                  |        | 2, 3, 5, 9, 10, 25 |
| 2   |                                      | 174.3                 |        |                    |
| 3   | 5.12, s                              | 84.8                  |        | 1, 2, 4, 23        |
| 4   |                                      | 49.2                  |        |                    |
| 5   | 1.62, m                              | 56.5                  | 6      |                    |
| 6   | 1.33, 1.45, m                        | 23.3                  | 5, 7   |                    |
| 7   | 1.30, m                              | 34.0                  | 6      |                    |
| 8   |                                      | 41.6                  |        |                    |
| 9   | 1.52, m                              | 48.8                  | 11     |                    |
| 10  |                                      | 42.9                  |        |                    |
| 11  | 1.55, 0.92, m                        | 25.5                  | 9, 12  |                    |
| 12  | 1.46, m                              | 23.4                  | 11, 13 |                    |
| 13  | 2.19, m                              | 38.2                  | 12, 18 |                    |
| 14  |                                      | 42.9                  |        |                    |
| 15  | 1.42, 1.10, m                        | 29.9                  | 16     |                    |
| 16  | 1.80, 1.33, m                        | 30.5                  | 15     | 28                 |
| 17  |                                      |                       |        |                    |
| 18  | 1.53, m                              | 48.9                  | 13, 19 | 28                 |
| 19  | 2.94, m                              | 47.0                  | 18, 21 |                    |
| 20  |                                      | 150.5                 |        |                    |
| 21  | 1.81, 1.42, m                        | 36.7                  | 22     |                    |
| 22  | 1.36, m                              | 38.8                  | 21     |                    |
| 23  | 1.20, s                              | 29.9                  |        | 3, 4, 5, 24        |
| 24  | 1.10, s                              | 17.5                  |        | 4, 5, 23           |
| 25  | 0.88, s                              | 19.1                  |        | 1, 9, 10           |
| 26  | 1.00, s                              | 16.5                  |        | 8, 9, 14           |
| 27  | 0.99, s                              | 14.9                  |        | 8, 13, 14, 15      |
| 28  |                                      | 177.6                 |        |                    |
| 29  | 4.71, s, 4.58, s                     | 110.1                 |        | 19, 30             |
| 30  | 1.64, s                              | 19.4                  |        | 19, 20, 29         |
| 31  | 2.04, s                              | 19.9                  |        | 32                 |
| 32  |                                      | 169.6                 |        |                    |

\* assignments supported by HSQC and HMBC experiments.

**Table S7.** Statistical analysis of differences in IC<sub>50</sub> values of compounds 1–6 and the control NSAIDs derived from Table 1 using the Student-Newman-Keuls Multiple Comparison Test.

| Compared Pair                                       | Significant? $p < 0.05?$ | Summary |
|-----------------------------------------------------|--------------------------|---------|
| <b>Nitric Oxide (<math>n = 8</math>)</b>            |                          |         |
| 3 vs. Ibuprofen                                     | Yes                      | ***     |
| 3 vs. Diclophenac                                   | Yes                      | ***     |
| 3 vs. 1                                             | No                       | ns      |
| 3 vs. 2                                             | No                       | ns      |
| 3 vs. 6                                             | No                       | ns      |
| 3 vs. 5                                             | No                       | ns      |
| 3 vs. 4                                             | No                       | ns      |
| 4 vs. Ibuprofen                                     | Yes                      | ***     |
| 4 vs. Diclophenac                                   | Yes                      | ***     |
| 4 vs. 1                                             | No                       | ns      |
| 4 vs. 2                                             | No                       | ns      |
| 4 vs. 6                                             | No                       | ns      |
| 4 vs. 5                                             | No                       | ns      |
| 5 vs. Ibuprofen                                     | Yes                      | ***     |
| 5 vs. Diclophenac                                   | Yes                      | ***     |
| 5 vs. 1                                             | No                       | ns      |
| 5 vs. 2                                             | No                       | ns      |
| 5 vs. 6                                             | No                       | ns      |
| 6 vs. Ibuprofen                                     | Yes                      | ***     |
| 6 vs. Diclophenac                                   | Yes                      | ***     |
| 6 vs. 1                                             | No                       | ns      |
| 6 vs. 2                                             | No                       | ns      |
| 2 vs. Ibuprofen                                     | Yes                      | ***     |
| 2 vs. Diclophenac                                   | Yes                      | ***     |
| 2 vs. 1                                             | No                       | ns      |
| 1 vs. Ibuprofen                                     | No                       | ns      |
| 1 vs. Diclophenac                                   | No                       | ns      |
| Diclophenac vs. Ibuprofen                           | Yes                      | ***     |
| <b>TNF-<math>\alpha</math> (<math>n = 3</math>)</b> |                          |         |
| 4 vs. Ibuprofen                                     | Yes                      | ***     |
| 4 vs. Diclophenac                                   | No                       | ns      |
| 4 vs. 6                                             | No                       | ns      |
| 4 vs. 1                                             | No                       | ns      |
| 4 vs. 5                                             | No                       | ns      |
| 4 vs. 2                                             | No                       | ns      |
| 4 vs. 3                                             | No                       | ns      |
| 3 vs. Ibuprofen                                     | Yes                      | ***     |
| 3 vs. Diclophenac                                   | No                       | ns      |
| 3 vs. 6                                             | No                       | ns      |
| 3 vs. 1                                             | No                       | ns      |
| 3 vs. 5                                             | No                       | ns      |
| 3 vs. 2                                             | No                       | ns      |
| 2 vs. Ibuprofen                                     | Yes                      | ***     |
| 2 vs. Diclophenac                                   | No                       | ns      |
| 2 vs. 6                                             | No                       | ns      |
| 2 vs. 1                                             | No                       | ns      |
| 2 vs. 5                                             | No                       | ns      |
| 5 vs. Ibuprofen                                     | Yes                      | ***     |
| 5 vs. Diclophenac                                   | No                       | ns      |
| 5 vs. 6                                             | No                       | ns      |
| 5 vs. 1                                             | No                       | ns      |
| 1 vs. Ibuprofen                                     | No                       | ns      |
| 1 vs. Diclophenac                                   | No                       | ns      |
| 1 vs. 6                                             | No                       | ns      |
| 6 vs. Ibuprofen                                     | No                       | ns      |
| 6 vs. Diclophenac                                   | No                       | ns      |
| Diclophenac vs. Ibuprofen                           | No                       | ns      |

**Single Mass Analysis**

Tolerance = 100.0 PPM / DBE: min = 0.0, max = 50.0

Element prediction: Off

Number of isotope peaks used for i-FIT = 3

Monoisotopic Mass, Odd and Even Electron Ions

1 formula(e) evaluated with 1 results within limits (all results (up to 1000) for each mass)

Elements Used:

C: 28-32 H: 40-50 O: 0-5

3003fr2 in MeOH

20141201\_3003fr2 114 (2.029) Cm (111:121)

1: TOF MS ES+  
5.26e+004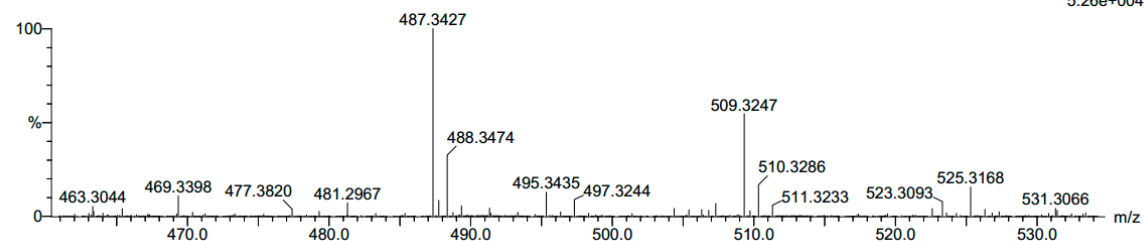

Minimum: 0.0  
Maximum: 5.0 100.0 50.0

| Mass     | Calc. Mass | mDa | PPM | DBE | i-FIT | i-FIT (Norm) | Formula    |
|----------|------------|-----|-----|-----|-------|--------------|------------|
| 487.3427 | 487.3424   | 0.3 | 0.6 | 7.5 | 257.4 | 0.0          | C30 H47 O5 |

**Figure S7.** HRMS spectrum for emmolic acid (1).

Tolerance = 100.0 PPM / DBE: min = 0.0, max = 50.0

Element prediction: Off

Number of isotope peaks used for i-FIT = 3

Monoisotopic Mass, Even Electron Ions

3 formula(e) evaluated with 2 results within limits (all results (up to 1000) for each mass)

Elements Used:

C: 28-32 H: 40-50 O: 0-5

3003fr5 in MeOH

20141201\_3003fr5 51 (0.914) Cm (48:51)

1: TOF MS ES+  
4.33e+002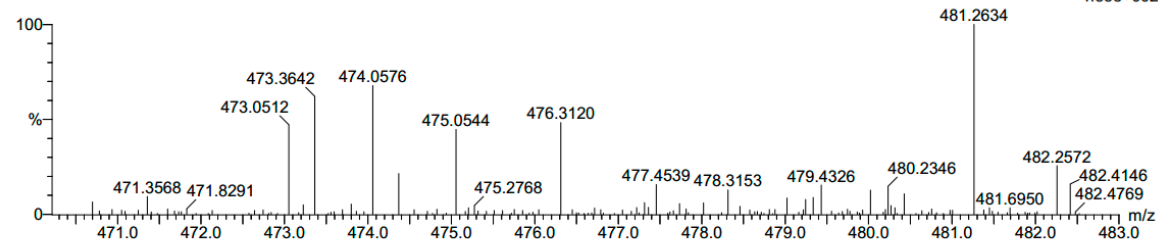

Minimum: 0.0  
Maximum: 5.0 100.0 50.0

| Mass     | Calc. Mass | mDa | PPM | DBE | i-FIT | i-FIT (Norm) | Formula    |
|----------|------------|-----|-----|-----|-------|--------------|------------|
| 473.3642 | 473.3631   | 1.1 | 2.3 | 6.5 | 121.7 | 0.6          | C30 H49 O4 |

**Figure S8.** HRMS spectrum for alphitolic acid (2).

**Single Mass Analysis**

Tolerance = 100.0 PPM / DBE: min = 0.0, max = 50.0

Element prediction: Off

Number of isotope peaks used for i-FIT = 3

Monoisotopic Mass, Even Electron Ions

1 formula(e) evaluated with 1 results within limits (all results (up to 1000) for each mass)

Elements Used:

C: 37-40 H: 52-56 O: 4-7 Na: 0-1

3003fr8 in MeOH

20141201\_3003fr8 162 (2.862) Cm (160:169)

1: TOF MS ES+  
1.86e+004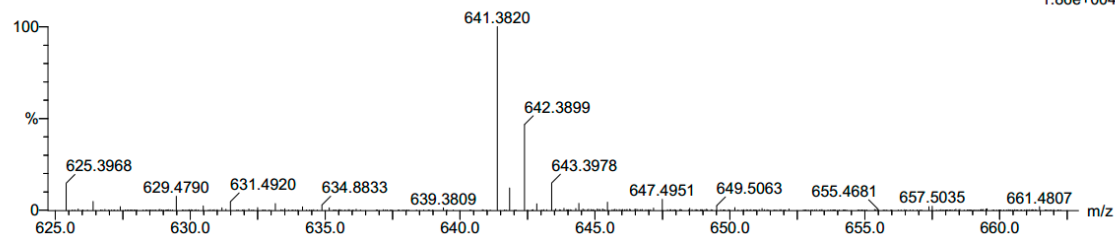

| Mass     | Calc. Mass | mDa | PPM | DBE  | i-FIT | i-FIT (Norm) | Formula       |
|----------|------------|-----|-----|------|-------|--------------|---------------|
| 641.3820 | 641.3818   | 0.2 | 0.3 | 12.5 | 121.5 | 0.0          | C39 H54 O6 Na |

Figure S9. HRMS spectrum for *trans*-coumaroyl aliphatic acid (3).**Single Mass Analysis**

Tolerance = 100.0 PPM / DBE: min = 0.0, max = 50.0

Element prediction: Off

Number of isotope peaks used for i-FIT = 3

Monoisotopic Mass, Even Electron Ions

1 formula(e) evaluated with 1 results within limits (all results (up to 1000) for each mass)

Elements Used:

C: 37-40 H: 52-56 O: 4-7 Na: 0-1

3003fr9 in MeOH

20141201\_3003fr9 74 (1.320) Cm (71:76)

1: TOF MS ES+  
5.03e+003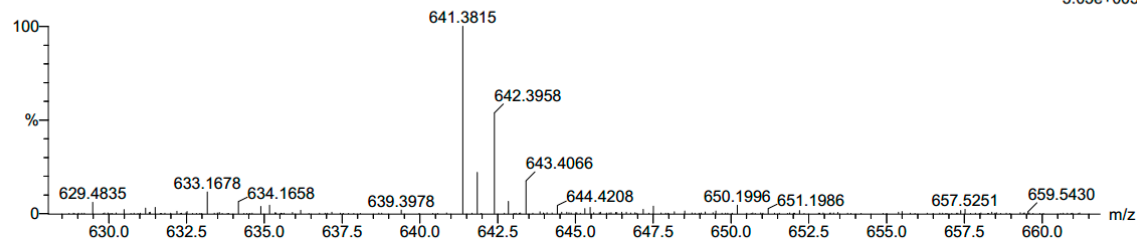

| Mass     | Calc. Mass | mDa  | PPM  | DBE  | i-FIT | i-FIT (Norm) | Formula       |
|----------|------------|------|------|------|-------|--------------|---------------|
| 641.3815 | 641.3818   | -0.3 | -0.5 | 12.5 | 85.4  | 0.0          | C39 H54 O6 Na |

Figure S10. HRMS spectrum for *cis*-coumaroyl aliphatic acid (4).

**Single Mass Analysis**

Tolerance = 100.0 PPM / DBE: min = 0.0, max = 50.0

Element prediction: Off

Number of isotope peaks used for i-FIT = 3

Monoisotopic Mass, Even Electron Ions

6 formula(e) evaluated with 4 results within limits (all results (up to 1000) for each mass)

Elements Used:

C: 28-32 H: 40-50 O: 0-5 Na: 0-1

3003fr10 in MeOH

20141201\_3003fr10 121 (2.149) Cm (114:131)

1: TOF MS ES+  
5.27e+003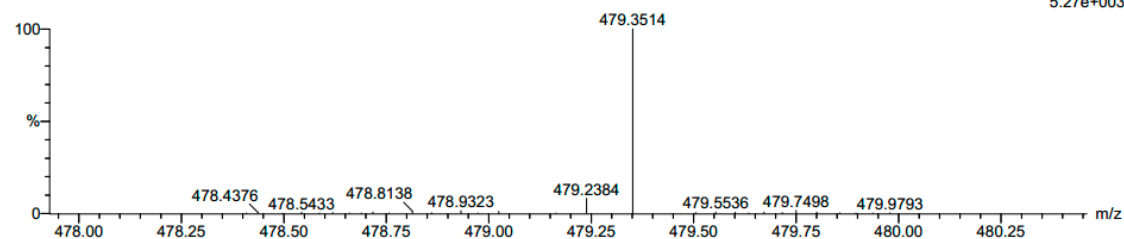

Minimum: 0.0  
Maximum: 5.0 100.0 50.0

| Mass     | Calc. Mass | mDa | PPM | DBE | i-FIT | i-FIT (Norm) | Formula       |
|----------|------------|-----|-----|-----|-------|--------------|---------------|
| 479.3514 | 479.3501   | 1.3 | 2.7 | 6.5 | 98.3  | 0.9          | C30 H48 O3 Na |

Figure S11. HRMS spectrum for betulinic acid (5).

**Single Mass Analysis**

Tolerance = 50.0 mDa / DBE: min = -1.5, max = 50.0

Element prediction: Off

Number of isotope peaks used for i-FIT = 3

Monoisotopic Mass, Even Electron Ions

8 formula(e) evaluated with 1 results within limits (up to 50 closest results for each mass)

Elements Used:

C: 30-32 H: 47-48 O: 0-8 Na: 0-2

20160907\_Ritesh\_alphaacetate 96 (1.701)

1: TOF MS ES+

1.23e+005

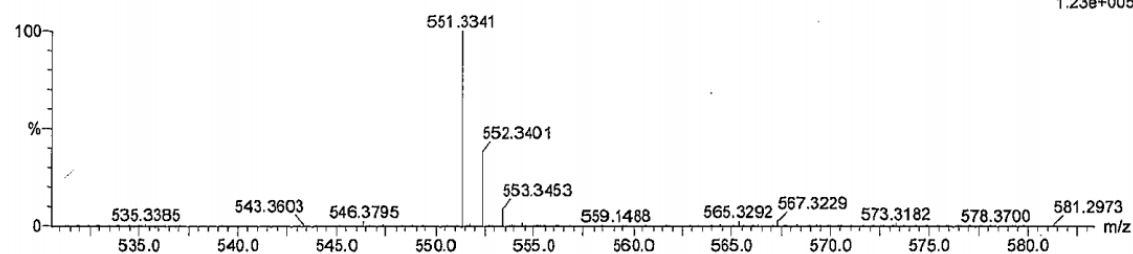

Minimum: -1.5  
Maximum: 50.0 15.0 50.0

| Mass     | Calc. Mass | mDa  | PPM  | DBE | i-FIT | i-FIT (Norm) | Formula       |
|----------|------------|------|------|-----|-------|--------------|---------------|
| 551.3341 | 551.3349   | -0.8 | -1.5 | 8.5 | 223.3 | 0.0          | C32 H48 O6 Na |

Figure S12. HRMS spectrum for emmolic acid acetate (6).
